# Supplementary material for: Design, Synthesis and Biological Evaluation of New Piperazin-4-yl-(acetyl-thiazolidine-2,4-dione) Norfloxacin Analogues as Antimicrobial Agents
Source: MDPI journal article supplement (doi:10.3390/molecules24213959), 2019-10-31

Chromatograms after HPLC analysis of the compounds:

Compound 2:

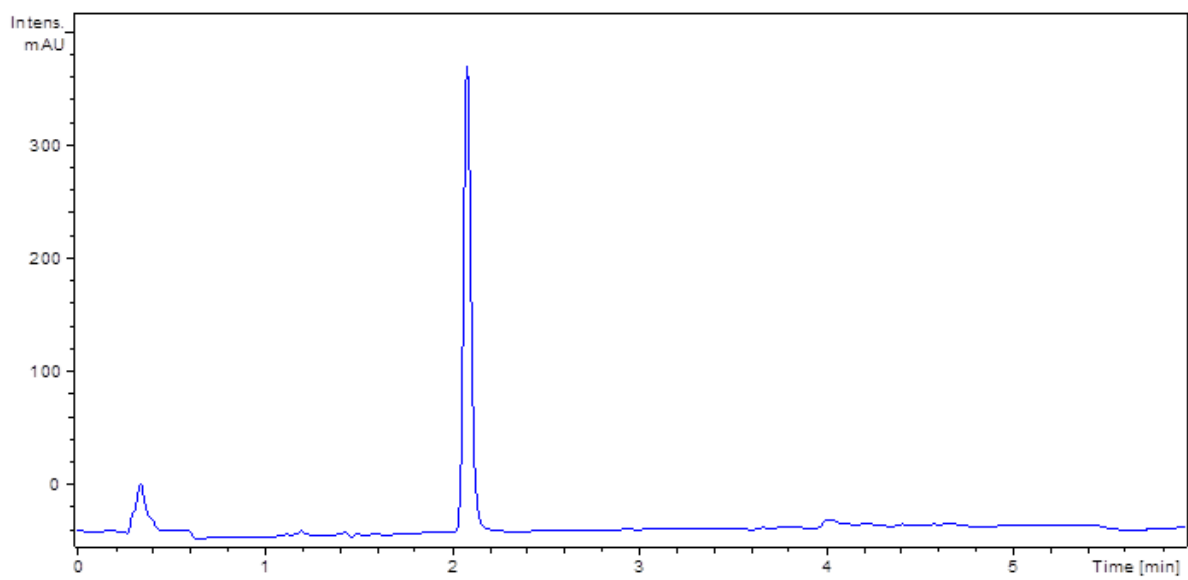

Compound 6:

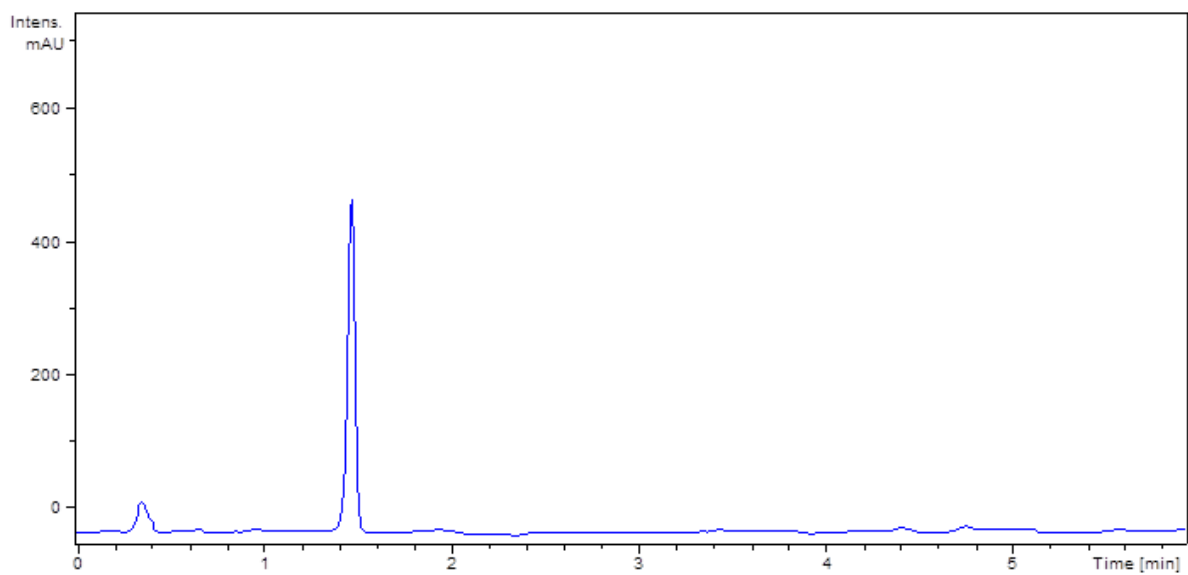

Compound 7a:

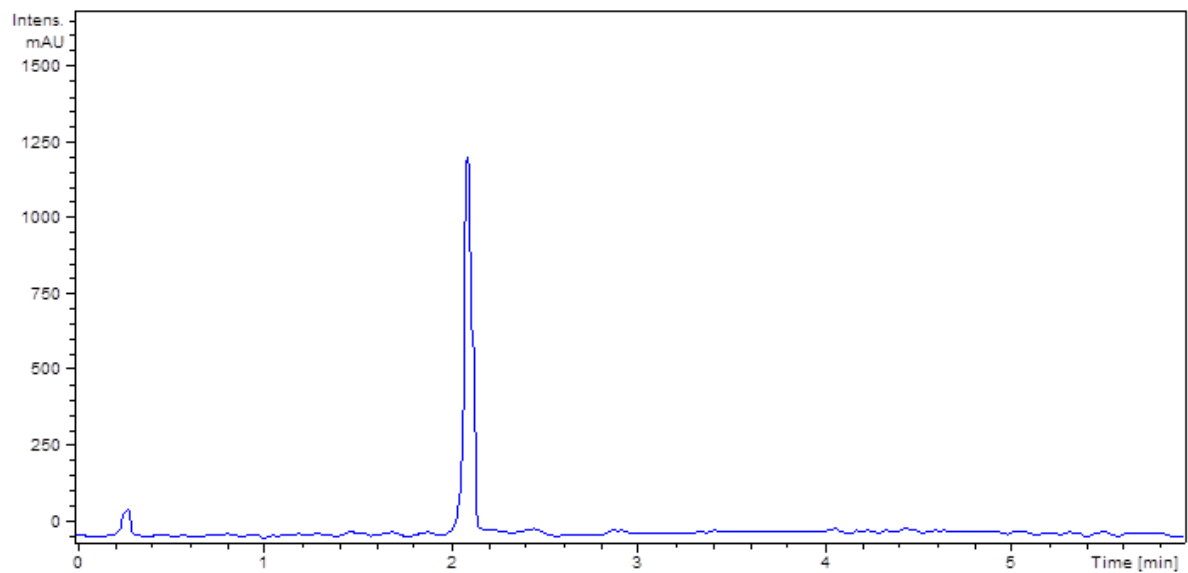

Compound 7b:

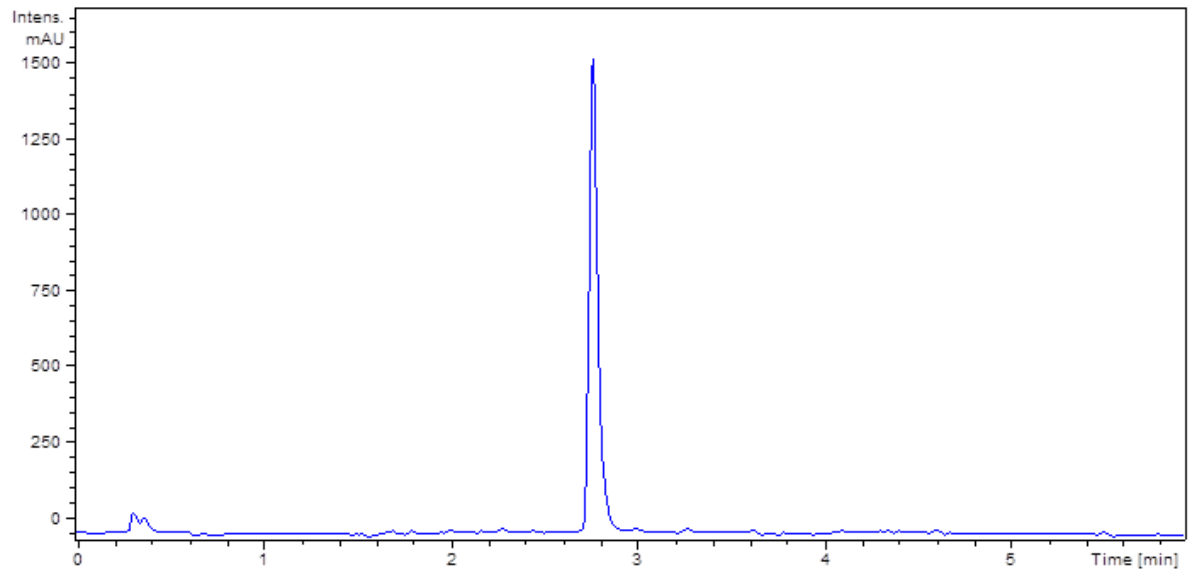

Compound 7c:

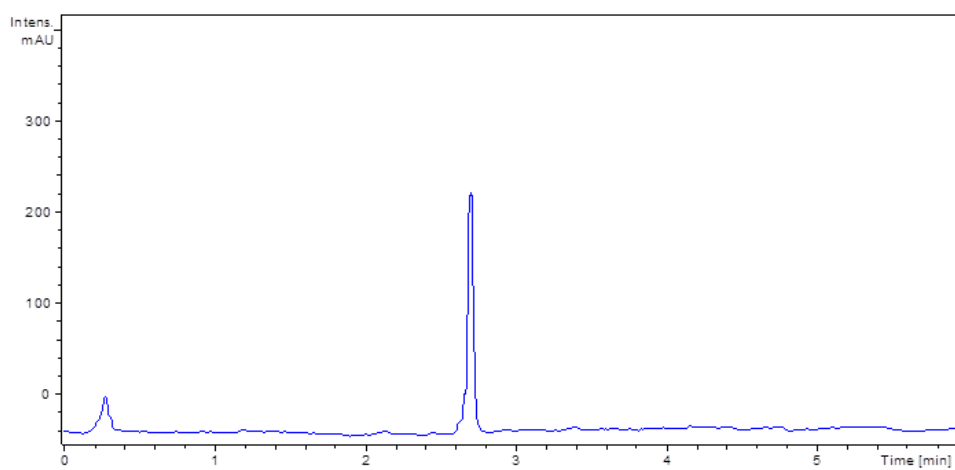

Compound 7d:

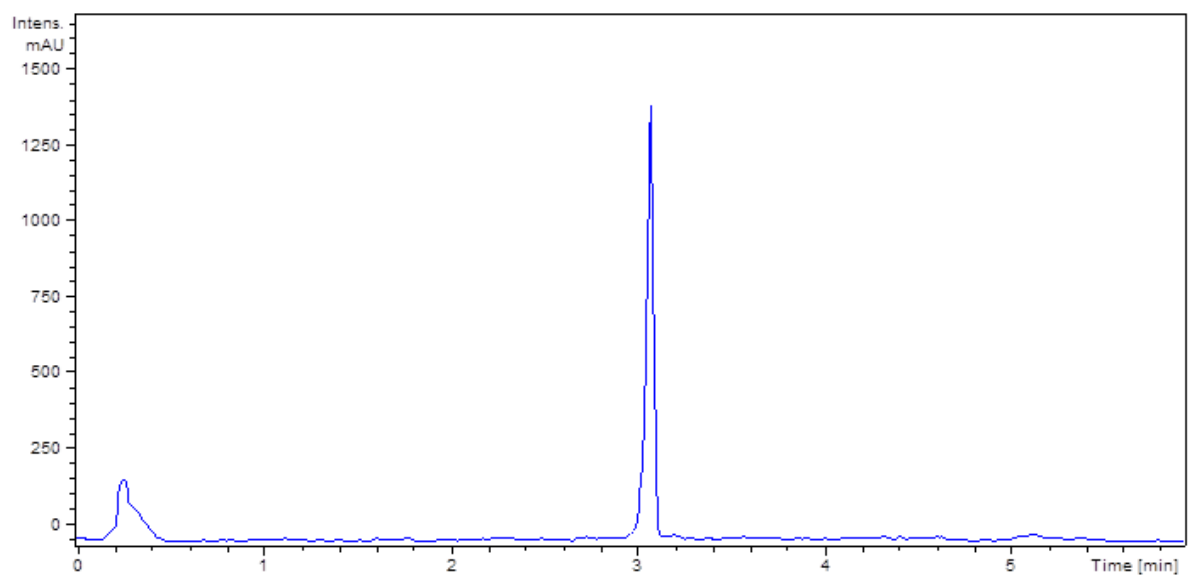

Compound 7e:

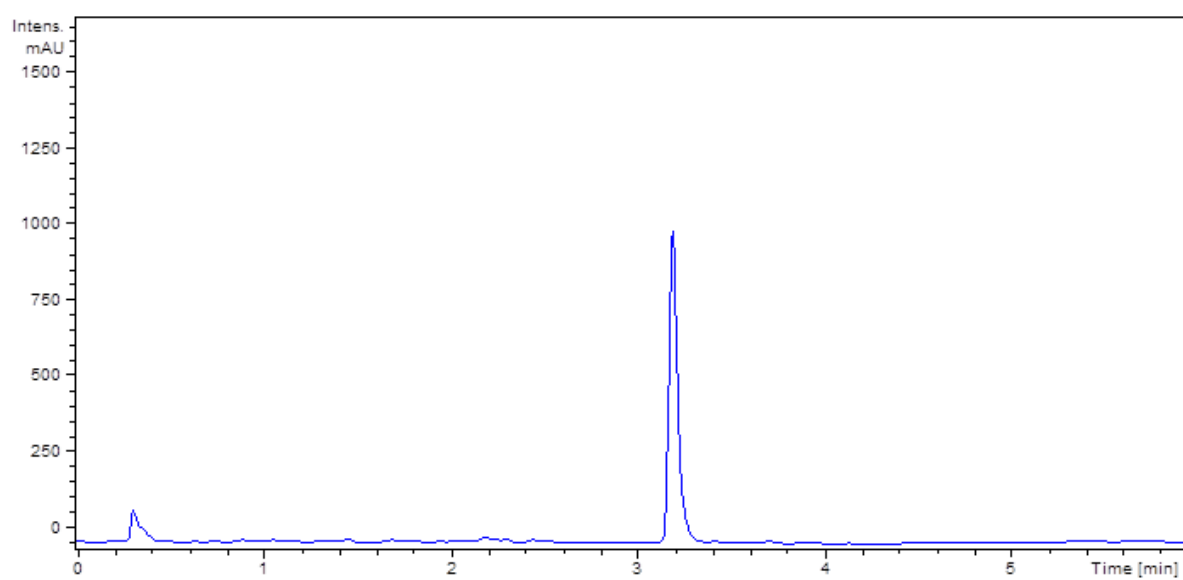

Compound 7f:

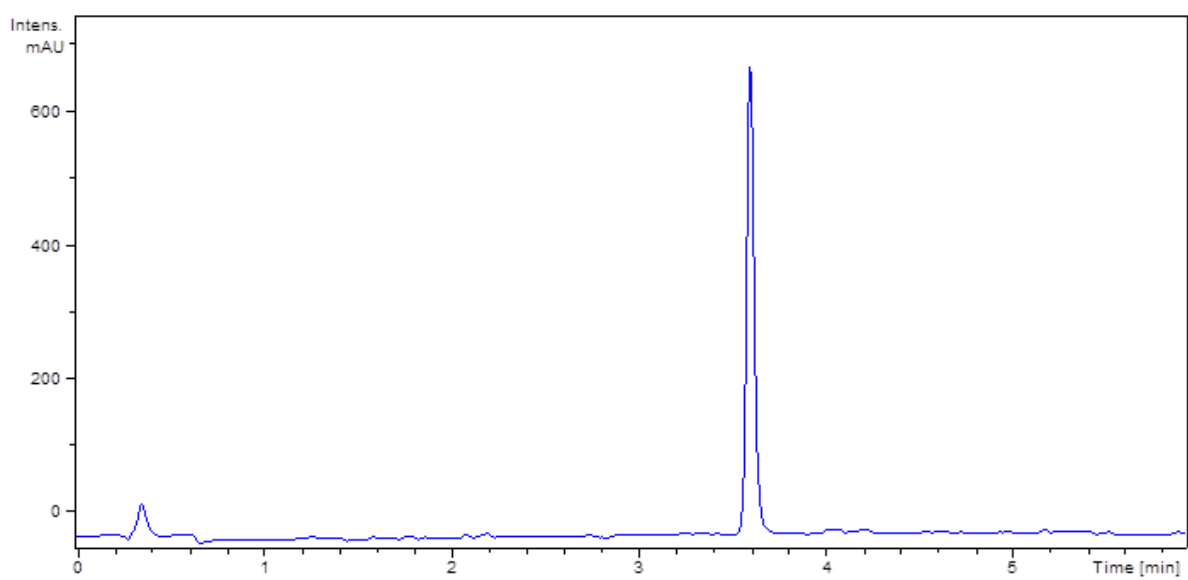

Supplement: s1 [file s1]
